# Supplementary material for: Synthesis and Crystal Structure of the Europium(II) Hydride Oxide Iodide Eu5H2O2I4 Showing Blue-Green Luminescence
Source: MDPI journal article supplement (doi:10.3390/ijms241914969), 2023-10-07
Supplement: s1 [file s1]

## Supporting Information

### Synthesis and crystal structure of the europium(II) hydride oxide iodide $\text{Eu}_5\text{H}_2\text{O}_2\text{I}_4$ showing blue-green luminescence

Daniel Rudolph<sup>1</sup>, Thomas Wylezich<sup>2</sup>, Philip Netzsch<sup>3</sup>, Björn Blaschkowski<sup>1</sup>, Henning A. Höppe<sup>3</sup>, Philippe Goldner<sup>4</sup>, Nathalie Kunkel<sup>5</sup>, Jean-Louis Hoslauer<sup>1</sup> and Thomas Schleid<sup>1,\*</sup>

<sup>1</sup> Institut für Anorganische Chemie, Universität Stuttgart, Pfaffenwaldring 55, 70569 Stuttgart, Germany;

blaschkowski@iac.uni-stuttgart.de (B.B.)

<sup>2</sup> Institut für Anorganische Chemie, Technische Universität München, Lichtenbergstrasse 4, 85747 Garching, Germany; thomas.wylezich@tum.de

<sup>3</sup> Institut für Physik, Universität Augsburg, Universitätsstraße 1, 86159 Augsburg, Germany

<sup>4</sup> Chimie ParisTech, PSL University, CNRS, Institut de Recherche de Chimie Paris, 75005 Paris, France

<sup>5</sup> Institut für Anorganische Chemie, Georg-August-Universität Göttingen, Tammannstrasse 4, 37077 Göttingen, Germany

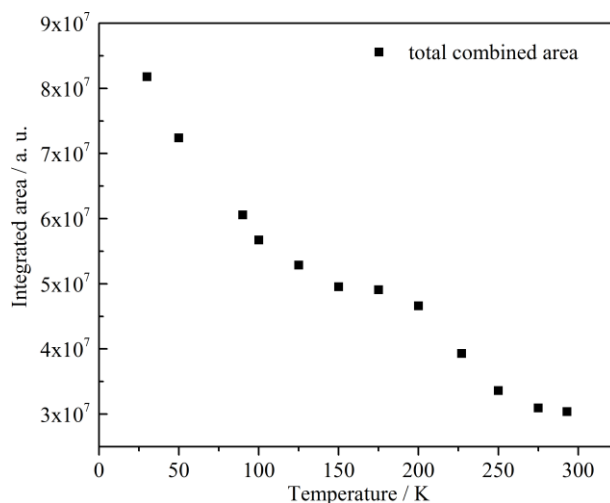

**Figure S1.** Temperature-dependent intensity of the emission (peak area) of  $\text{Eu}_5\text{H}_2\text{O}_2\text{I}_4$ . The quenching temperature is estimated to be around 110 K.

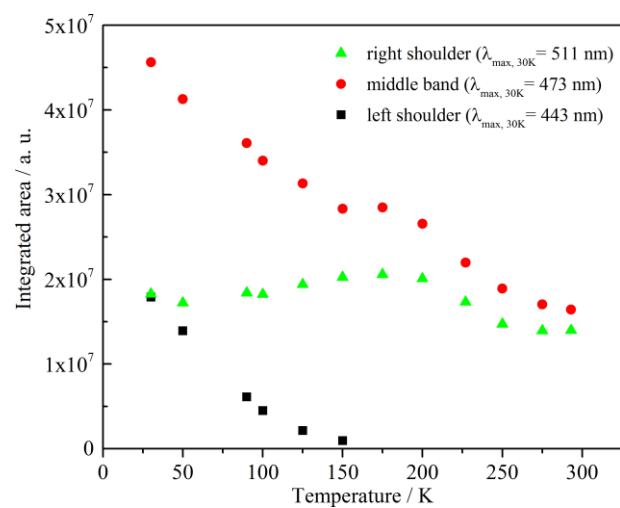

**Figure S2.** Integrated area of the three emission bands of  $\text{Eu}_5\text{H}_2\text{O}_2\text{I}_4$  resulting after deconvolution.

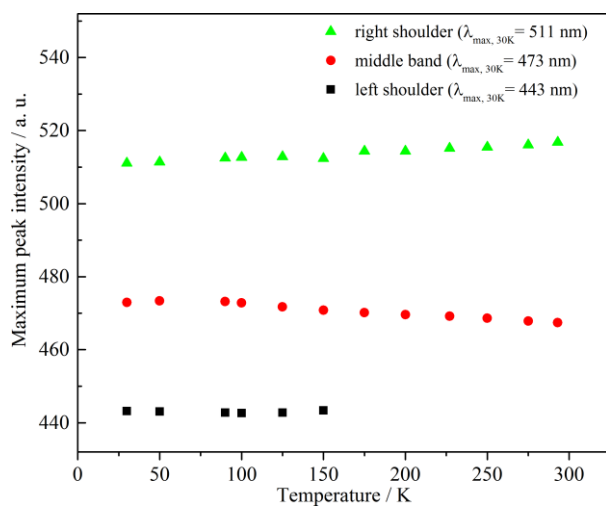

**Figure S3.** Change of the three individual emission positions in  $\text{Eu}_5\text{H}_2\text{O}_2\text{I}_4$  with temperature.

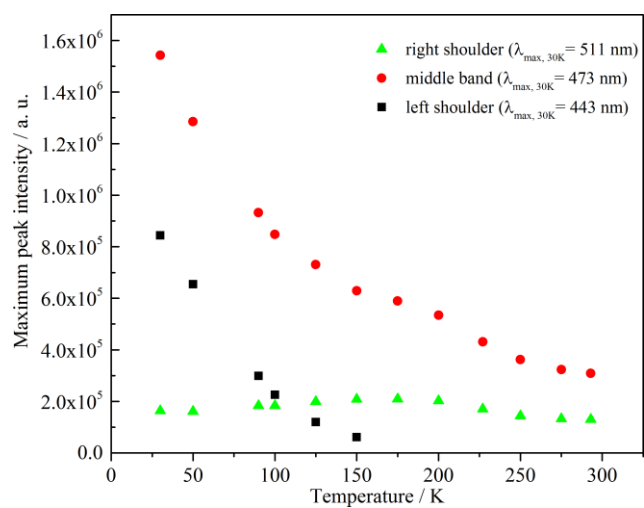

**Figure S4.** Maximum peak intensity of the three emission bands in  $\text{Eu}_5\text{H}_2\text{O}_2\text{I}_4$  after deconvolution.

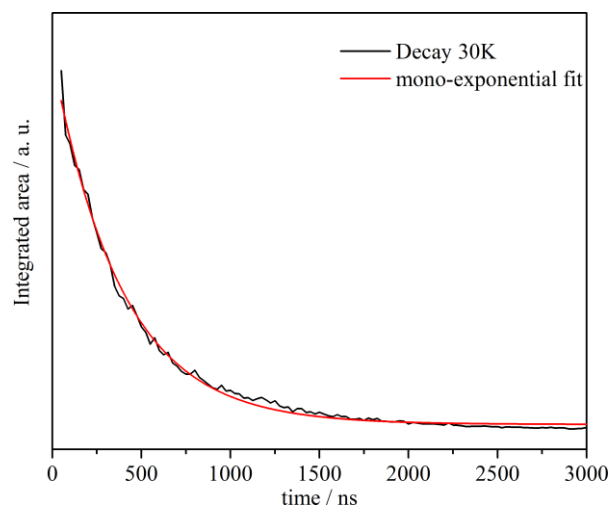

**Figure S5.** Decay curve of  $\text{Eu}_5\text{H}_2\text{O}_2\text{I}_4$  at 30 K. Fitting of the parameters using a mono-exponential decay results in a lifetime of the excited state of  $388 \pm 5$  ns.

\_audit\_creation\_method        SHELXL-97

\_chemical\_name\_systematic

;

?

;

\_chemical\_name\_common        ?

\_chemical\_melting\_point       ?

\_chemical\_formula\_moiety       ?

\_chemical\_formula\_sum

'Eu5 H2 I4 O2'

\_chemical\_formula\_weight       1301.42

loop\_

\_atom\_type\_symbol

\_atom\_type\_description

\_atom\_type\_scatter\_dispersion\_real

\_atom\_type\_scatter\_dispersion\_imag

\_atom\_type\_scatter\_source

'Eu' 'Eu' -0.1578 3.6682

'International Tables Vol C Tables 4.2.6.8 and 6.1.1.4'

'H' 'H' 0.0000 0.0000

'International Tables Vol C Tables 4.2.6.8 and 6.1.1.4'

'O' 'O' 0.0106 0.0060

'International Tables Vol C Tables 4.2.6.8 and 6.1.1.4'

'I' 'I' -0.4742 1.8119

'International Tables Vol C Tables 4.2.6.8 and 6.1.1.4'

\_symmetry\_cell\_setting        orthorhombic

\_symmetry\_space\_group\_name\_H-M   Cmc21

loop\_

\_symmetry\_equiv\_pos\_as\_xyz

'x, y, z'

'-x, -y, z+1/2'

'x, -y, -z'

'-x, y, -z+1/2'

'x+1/2, y+1/2, z'

'-x+1/2, -y+1/2, z+1/2'

'x+1/2, -y+1/2, -z'

'-x+1/2, y+1/2, -z+1/2'

'-x, -y, -z'

'x, y, -z-1/2'

'-x, y, z'

'x, -y, z-1/2'

'-x+1/2, -y+1/2, -z'

'x+1/2, y+1/2, -z-1/2'

'-x+1/2, y+1/2, z'

'x+1/2, -y+1/2, z-1/2'

\_cell\_length\_a 16.4251(9)  
\_cell\_length\_b 13.7423(8)  
\_cell\_length\_c 6.0658(4)  
\_cell\_angle\_alpha 90.00  
\_cell\_angle\_beta 90.00  
\_cell\_angle\_gamma 90.00  
\_cell\_volume 1369.16(14)  
\_cell\_formula\_units\_Z 4  
\_cell\_measurement\_temperature 293(2)  
\_cell\_measurement\_reflns\_used 955  
\_cell\_measurement\_theta\_min 0.41  
\_cell\_measurement\_theta\_max 27.88

\_exptl\_crystal\_description 'lath shaped'  
\_exptl\_crystal\_colour 'red'  
\_exptl\_crystal\_size\_max 0.160  
\_exptl\_crystal\_size\_mid 0.081  
\_exptl\_crystal\_size\_min 0.043  
\_exptl\_crystal\_density\_meas ?  
\_exptl\_crystal\_density\_diffn 6.313  
\_exptl\_crystal\_density\_method 'not measured'  
\_exptl\_crystal\_F\_000 2180  
\_exptl\_absorpt\_coefficient\_mu 31.548  
\_exptl\_absorpt\_correction\_type empirical  
\_exptl\_absorpt\_correction\_T\_min 0.005  
\_exptl\_absorpt\_correction\_T\_max 0.232  
\_exptl\_absorpt\_process\_details 'SCALEPACK (W. Minor & Z. Otwinowski)'

\_exptl\_special\_details

;  
?  
;

\_diffn\_ambient\_temperature 293(2)  
\_diffn\_radiation\_wavelength 0.71069  
\_diffn\_radiation\_type MoK $\alpha$   
\_diffn\_radiation\_source 'fine-focus sealed tube'  
\_diffn\_radiation\_monochromator graphite  
\_diffn\_measurement\_device\_type 'Kappa CCD (Nonius)'  
\_diffn\_measurement\_method 'four circle, CCD'  
\_diffn\_detector\_area\_resol\_mean ?  
\_diffn\_standards\_number ?  
\_diffn\_standards\_interval\_count ?  
\_diffn\_standards\_interval\_time ?  
\_diffn\_standards\_decay\_% ?

```

_diffrn_reflms_number      1618
_diffrn_reflms_av_R_equivalents  0.0564
_diffrn_reflms_av_signal/netl  0.0229
_diffrn_reflms_limit_h_min    -21
_diffrn_reflms_limit_h_max    21
_diffrn_reflms_limit_k_min    -18
_diffrn_reflms_limit_k_max    18
_diffrn_reflms_limit_l_min    -7
_diffrn_reflms_limit_l_max    7
_diffrn_reflms_theta_min     1.93
_diffrn_reflms_theta_max     27.88
_reflms_number_total        921
_reflms_number_gt           863
_reflms_threshold_expression  >2sigma(I)

```

```

_computing_data_collection   'Nonius Collect-Software'
_computing_cell_refinement   'Denzo (W. Minor & Z. Otwinowski)'
_computing_data_reduction    'Denzo (W. Minor & Z. Otwinowski)'
_computing_structure_solution 'SHELXS-97 (Sheldrick, 1990)'
_computing_structure_refinement 'SHELXL-97 (Sheldrick, 1997)'
_computing_molecular_graphics ?
_computing_publication_material ?

```

```
_refine_special_details
```

```
;
```

Refinement of  $F^2$  against ALL reflections. The weighted R-factor wR and goodness of fit S are based on  $F^2$ , conventional R-factors R are based on F, with F set to zero for negative  $F^2$ . The threshold expression of  $F^2 > 2\sigma(F^2)$  is used only for calculating R-factors(gt) etc. and is not relevant to the choice of reflections for refinement. R-factors based on  $F^2$  are statistically about twice as large as those based on F, and R-factors based on ALL data will be even larger.

```
;
```

```

_refine_ls_structure_factor_coef Fsqd
_refine_ls_matrix_type      full
_refine_ls_weighting_scheme  calc
_refine_ls_weighting_details
'calc w=1/[\s^2*(Fo^2)+(0.0717P)^2+31.1628P] where P=(Fo^2+2Fc^2)/3'
_atom_sites_solution_primary direct
_atom_sites_solution_secondary difmap
_refine_ls_extinction_method SHELXL
_refine_ls_extinction_coef   0.00159(12)
_refine_ls_extinction_expression
'Fc^*=kFc[1+0.001xFc^2/l^3^/sin(2\q)]^-1/4'
_refine_ls_number_reflms    921
_refine_ls_number_parameters 45

```

\_refine\_ls\_number\_restraints 0  
\_refine\_ls\_R\_factor\_all 0.0412  
\_refine\_ls\_R\_factor\_gt 0.0390  
\_refine\_ls\_wR\_factor\_ref 0.1057  
\_refine\_ls\_wR\_factor\_gt 0.1037  
\_refine\_ls\_goodness\_of\_fit\_ref 1.068  
\_refine\_ls\_restrained\_S\_all 1.068  
\_refine\_ls\_shift/su\_max 0.000  
\_refine\_ls\_shift/su\_mean 0.000

loop\_

\_atom\_site\_label  
\_atom\_site\_type\_symbol  
\_atom\_site\_fract\_x  
\_atom\_site\_fract\_y  
\_atom\_site\_fract\_z  
\_atom\_site\_U\_iso\_or\_equiv  
\_atom\_site\_adp\_type  
\_atom\_site\_occupancy  
\_atom\_site\_symmetry\_multiplicity  
\_atom\_site\_calc\_flag  
\_atom\_site\_refinement\_flags  
\_atom\_site\_disorder\_assembly  
\_atom\_site\_disorder\_group

Eu1 Eu 0.0000 0.90947(6) 0.2500 0.0172(3) Uani 1 4 d S . .  
Eu2 Eu 0.18819(4) 0.08329(4) 0.2500 0.0141(2) Uani 1 2 d S . .  
Eu3 Eu 0.15234(4) 0.40378(4) 0.2500 0.0181(3) Uani 1 2 d S . .  
O O 0.2766(5) 0.0000 0.0000 0.0206(18) Uani 1 2 d S . .  
H H 0.089(9) 0.0000 0.0000 0.052 Uiso 1 2 d S . .  
I1 I 0.0000 0.21795(9) 0.2500 0.0216(3) Uani 1 4 d S . .  
I2 I 0.0000 0.5601(5) 0.2500 0.039(3) Uiso 0.284(11) 4 d SP . .  
I3A I 0.0000 0.5503(4) 0.1422(11) 0.027(2) Uiso 0.212(8) 2 d SP . .  
I3B I 0.0000 0.5234(7) 0.0577(16) 0.040(3) Uiso 0.150(7) 2 d SP . .  
I4 I 0.32802(5) 0.26771(7) 0.2500 0.0225(3) Uani 1 2 d S . .

loop\_

\_atom\_site\_aniso\_label  
\_atom\_site\_aniso\_U\_11  
\_atom\_site\_aniso\_U\_22  
\_atom\_site\_aniso\_U\_33  
\_atom\_site\_aniso\_U\_23  
\_atom\_site\_aniso\_U\_13  
\_atom\_site\_aniso\_U\_12

Eu1 0.0131(5) 0.0123(4) 0.0262(5) 0.000 0.000 0.000  
Eu2 0.0113(4) 0.0087(4) 0.0224(4) 0.000 0.000 0.00074(18)  
Eu3 0.0117(4) 0.0133(4) 0.0294(4) 0.000 0.000 -0.0032(2)  
O 0.021(4) 0.016(4) 0.026(4) -0.006(3) 0.000 0.000

I1 0.0167(6) 0.0218(6) 0.0264(6) 0.000 0.000 0.000  
I4 0.0160(4) 0.0186(5) 0.0328(5) 0.000 0.000 -0.0053(3)

\_geom\_special\_details

;

All esds (except the esd in the dihedral angle between two l.s. planes)  
are estimated using the full covariance matrix. The cell esds are taken  
into account individually in the estimation of esds in distances, angles  
and torsion angles; correlations between esds in cell parameters are only  
used when they are defined by crystal symmetry. An approximate (isotropic)  
treatment of cell esds is used for estimating esds involving l.s. planes.

;

loop\_

\_geom\_bond\_atom\_site\_label\_1

\_geom\_bond\_atom\_site\_label\_2

\_geom\_bond\_distance

\_geom\_bond\_site\_symmetry\_2

\_geom\_bond\_publ\_flag

Eu1 I4 3.4314(10) 5\_455 ?

Eu1 I4 3.4314(10) 15 ?

Eu1 I1 3.5021(8) 9\_565 ?

Eu1 I1 3.5021(8) 9\_566 ?

Eu1 Eu2 3.9065(9) 1\_565 ?

Eu1 Eu2 3.9065(9) 11\_565 ?

Eu1 Eu1 3.9229(11) 9\_576 ?

Eu1 Eu1 3.9229(11) 9\_575 ?

Eu1 Eu2 4.3317(5) 3\_566 ?

Eu1 Eu2 4.3317(5) 9\_565 ?

Eu1 Eu2 4.3317(5) 9\_566 ?

Eu1 Eu2 4.3317(5) 3\_565 ?

Eu2 O 2.391(5) . ?

Eu2 O 2.391(5) 10\_556 ?

Eu2 I4 3.4202(9) . ?

Eu2 Eu3 3.5981(9) 15\_545 ?

Eu2 I1 3.6027(9) . ?

Eu2 I4 3.6690(7) 13\_556 ?

Eu2 I4 3.6690(7) 13 ?

Eu2 Eu2 3.7999(7) 3 ?

Eu2 Eu2 3.7999(7) 3\_556 ?

Eu2 Eu1 3.9065(9) 1\_545 ?

Eu2 Eu3 4.0114(7) 13\_556 ?

Eu2 Eu3 4.0114(7) 13 ?

Eu2 H 2.50(10) . ?

Eu3 O 2.326(4) 6 ?

Eu3 O 2.326(4) 13 ?

Eu3 I3B 3.213(4) 10\_556 ?



Eu3 I3B 3.213(4) . ?  
Eu3 I3A 3.278(3) . ?  
Eu3 I3A 3.278(3) 10\_556 ?  
Eu3 I3B 3.278(5) 9\_565 ?  
Eu3 I3B 3.278(5) 2\_565 ?  
Eu3 I2 3.298(4) . ?  
Eu3 I4 3.4384(11) . ?  
Eu3 I3A 3.510(4) 9\_565 ?  
Eu3 I3A 3.510(4) 2\_565 ?  
O Eu3 2.326(4) 15\_545 ?  
O Eu3 2.326(4) 13 ?  
O Eu2 2.391(5) 3 ?  
I1 Eu1 3.5021(8) 9\_565 ?  
I1 Eu1 3.5021(8) 9\_566 ?  
I1 Eu3 3.5752(10) 11 ?  
I1 Eu2 3.6027(9) 11 ?  
I2 I3A 0.667(7) 10\_556 ?  
I2 I3A 0.667(7) . ?  
I2 I3B 1.271(12) . ?  
I2 I3B 1.271(12) 10\_556 ?  
I2 I3B 2.191(12) 9\_565 ?  
I2 I3B 2.191(12) 2\_565 ?  
I2 I3A 2.822(8) 9\_565 ?  
I2 I3A 2.822(8) 2\_565 ?  
I2 Eu3 3.298(4) 11 ?  
I3A I3B 0.632(9) . ?  
I3A I3A 1.308(13) 10\_556 ?  
I3A I3B 1.580(17) 9\_565 ?  
I3A I3B 1.858(15) 10\_556 ?  
I3A I3A 2.211(14) 9\_565 ?  
I3A I3B 2.716(10) 2\_565 ?  
I3A I2 2.822(8) 9\_565 ?  
I3A Eu3 3.278(3) 11 ?  
I3A Eu3 3.510(4) 9\_565 ?  
I3A Eu3 3.510(4) 3\_565 ?  
I3B I3B 0.95(2) 9\_565 ?  
I3B I3A 1.580(17) 9\_565 ?  
I3B I3A 1.858(15) 10\_556 ?  
I3B I2 2.191(12) 9\_565 ?  
I3B I3B 2.33(2) 10\_556 ?  
I3B I3A 2.716(10) 2\_564 ?  
I3B I3B 3.100(4) 2\_564 ?  
I3B I3B 3.100(4) 2\_565 ?  
I3B Eu3 3.213(4) 11 ?  
I4 Eu1 3.4314(10) 5\_545 ?  
I4 Eu2 3.6690(7) 13\_556 ?  
I4 Eu2 3.6690(7) 13 ?

loop\_  
\_geom\_angle\_atom\_site\_label\_1  
\_geom\_angle\_atom\_site\_label\_2  
\_geom\_angle\_atom\_site\_label\_3  
\_geom\_angle  
\_geom\_angle\_site\_symmetry\_1  
\_geom\_angle\_site\_symmetry\_3  
\_geom\_angle\_publ\_flag  
I4 Eu1 I4 110.82(4) 5\_455 15 ?  
I4 Eu1 I1 73.510(19) 5\_455 9\_565 ?  
I4 Eu1 I1 73.510(19) 15 9\_565 ?  
I4 Eu1 I1 73.510(19) 5\_455 9\_566 ?  
I4 Eu1 I1 73.510(19) 15 9\_566 ?  
I1 Eu1 I1 120.00(5) 9\_565 9\_566 ?  
I4 Eu1 Eu2 176.90(3) 5\_455 1\_565 ?  
I4 Eu1 Eu2 72.286(19) 15 1\_565 ?  
I1 Eu1 Eu2 107.802(11) 9\_565 1\_565 ?  
I1 Eu1 Eu2 107.802(11) 9\_566 1\_565 ?  
I4 Eu1 Eu2 72.286(19) 5\_455 11\_565 ?  
I4 Eu1 Eu2 176.90(3) 15 11\_565 ?  
I1 Eu1 Eu2 107.802(11) 9\_565 11\_565 ?  
I1 Eu1 Eu2 107.802(11) 9\_566 11\_565 ?  
Eu2 Eu1 Eu2 104.61(3) 1\_565 11\_565 ?  
I4 Eu1 Eu1 111.105(9) 5\_455 9\_576 ?  
I4 Eu1 Eu1 111.105(9) 15 9\_576 ?  
I1 Eu1 Eu1 170.63(4) 9\_565 9\_576 ?  
I1 Eu1 Eu1 69.365(18) 9\_566 9\_576 ?  
Eu2 Eu1 Eu1 67.181(16) 1\_565 9\_576 ?  
Eu2 Eu1 Eu1 67.181(16) 11\_565 9\_576 ?  
I4 Eu1 Eu1 111.105(9) 5\_455 9\_575 ?  
I4 Eu1 Eu1 111.105(9) 15 9\_575 ?  
I1 Eu1 Eu1 69.365(18) 9\_565 9\_575 ?  
I1 Eu1 Eu1 170.63(4) 9\_566 9\_575 ?  
Eu2 Eu1 Eu1 67.181(16) 1\_565 9\_575 ?  
Eu2 Eu1 Eu1 67.181(16) 11\_565 9\_575 ?  
Eu1 Eu1 Eu1 101.27(4) 9\_576 9\_575 ?  
I4 Eu1 Eu2 126.906(17) 5\_455 3\_566 ?  
I4 Eu1 Eu2 54.941(12) 15 3\_566 ?  
I1 Eu1 Eu2 128.159(15) 9\_565 3\_566 ?  
I1 Eu1 Eu2 53.496(10) 9\_566 3\_566 ?  
Eu2 Eu1 Eu2 54.641(12) 1\_565 3\_566 ?  
Eu2 Eu1 Eu2 123.409(15) 11\_565 3\_566 ?  
Eu1 Eu1 Eu2 56.229(8) 9\_576 3\_566 ?  
Eu1 Eu1 Eu2 121.79(2) 9\_575 3\_566 ?  
I4 Eu1 Eu2 54.941(12) 5\_455 9\_565 ?  
I4 Eu1 Eu2 126.906(17) 15 9\_565 ?

I1 Eu1 Eu2 53.496(10) 9\_565 9\_565 ?  
 I1 Eu1 Eu2 128.159(15) 9\_566 9\_565 ?  
 Eu2 Eu1 Eu2 123.409(15) 1\_565 9\_565 ?  
 Eu2 Eu1 Eu2 54.641(12) 11\_565 9\_565 ?  
 Eu1 Eu1 Eu2 121.79(2) 9\_576 9\_565 ?  
 Eu1 Eu1 Eu2 56.229(8) 9\_575 9\_565 ?  
 Eu2 Eu1 Eu2 177.37(2) 3\_566 9\_565 ?  
 I4 Eu1 Eu2 54.941(12) 5\_455 9\_566 ?  
 I4 Eu1 Eu2 126.906(17) 15 9\_566 ?  
 I1 Eu1 Eu2 128.159(15) 9\_565 9\_566 ?  
 I1 Eu1 Eu2 53.496(10) 9\_566 9\_566 ?  
 Eu2 Eu1 Eu2 123.409(15) 1\_565 9\_566 ?  
 Eu2 Eu1 Eu2 54.641(12) 11\_565 9\_566 ?  
 Eu1 Eu1 Eu2 56.229(8) 9\_576 9\_566 ?  
 Eu1 Eu1 Eu2 121.79(2) 9\_575 9\_566 ?  
 Eu2 Eu1 Eu2 91.059(13) 3\_566 9\_566 ?  
 Eu2 Eu1 Eu2 88.881(13) 9\_565 9\_566 ?  
 I4 Eu1 Eu2 126.906(17) 5\_455 3\_565 ?  
 I4 Eu1 Eu2 54.941(12) 15 3\_565 ?  
 I1 Eu1 Eu2 53.496(10) 9\_565 3\_565 ?  
 I1 Eu1 Eu2 128.159(15) 9\_566 3\_565 ?  
 Eu2 Eu1 Eu2 54.641(12) 1\_565 3\_565 ?  
 Eu2 Eu1 Eu2 123.409(15) 11\_565 3\_565 ?  
 Eu1 Eu1 Eu2 121.79(2) 9\_576 3\_565 ?  
 Eu1 Eu1 Eu2 56.229(8) 9\_575 3\_565 ?  
 Eu2 Eu1 Eu2 88.881(13) 3\_566 3\_565 ?  
 Eu2 Eu1 Eu2 91.059(13) 9\_565 3\_565 ?  
 Eu2 Eu1 Eu2 177.37(2) 9\_566 3\_565 ?  
 O Eu2 O 78.73(19) . 10\_556 ?  
 O Eu2 I4 86.97(13) . . ?  
 O Eu2 I4 86.97(13) 10\_556 . ?  
 O Eu2 Eu3 39.63(8) . 15\_545 ?  
 O Eu2 Eu3 39.63(8) 10\_556 15\_545 ?  
 I4 Eu2 Eu3 91.10(3) . 15\_545 ?  
 O Eu2 I1 140.06(12) . . ?  
 O Eu2 I1 140.07(12) 10\_556 . ?  
 I4 Eu2 I1 101.27(3) . . ?  
 Eu3 Eu2 I1 167.62(3) 15\_545 . ?  
 O Eu2 I4 146.67(16) . 13\_556 ?  
 O Eu2 I4 77.70(4) 10\_556 13\_556 ?  
 I4 Eu2 I4 68.605(17) . 13\_556 ?  
 Eu3 Eu2 I4 115.813(17) 15\_545 13\_556 ?  
 I1 Eu2 I4 69.579(18) . 13\_556 ?  
 O Eu2 I4 77.70(4) . 13 ?  
 O Eu2 I4 146.67(16) 10\_556 13 ?  
 I4 Eu2 I4 68.605(17) . 13 ?  
 Eu3 Eu2 I4 115.813(17) 15\_545 13 ?

I1 Eu2 I4 69.579(18) . 13 ?  
I4 Eu2 I4 111.51(3) 13\_556 13 ?  
O Eu2 Eu2 37.38(16) . 3 ?  
O Eu2 Eu2 102.58(3) 10\_556 3 ?  
I4 Eu2 Eu2 116.514(11) . 3 ?  
Eu3 Eu2 Eu2 65.603(13) 15\_545 3 ?  
I1 Eu2 Eu2 108.026(10) . 3 ?  
I4 Eu2 Eu2 174.86(2) 13\_556 3 ?  
I4 Eu2 Eu2 71.120(13) 13 3 ?  
O Eu2 Eu2 102.58(3) . 3\_556 ?  
O Eu2 Eu2 37.38(16) 10\_556 3\_556 ?  
I4 Eu2 Eu2 116.514(11) . 3\_556 ?  
Eu3 Eu2 Eu2 65.603(13) 15\_545 3\_556 ?  
I1 Eu2 Eu2 108.026(10) . 3\_556 ?  
I4 Eu2 Eu2 71.120(13) 13\_556 3\_556 ?  
I4 Eu2 Eu2 174.86(2) 13 3\_556 ?  
Eu2 Eu2 Eu2 105.91(3) 3 3\_556 ?  
O Eu2 Eu1 100.81(14) . 1\_545 ?  
O Eu2 Eu1 100.82(14) 10\_556 1\_545 ?  
I4 Eu2 Eu1 169.88(3) . 1\_545 ?  
Eu3 Eu2 Eu1 99.02(2) 15\_545 1\_545 ?  
I1 Eu2 Eu1 68.60(2) . 1\_545 ?  
I4 Eu2 Eu1 106.488(17) 13\_556 1\_545 ?  
I4 Eu2 Eu1 106.488(17) 13 1\_545 ?  
Eu2 Eu2 Eu1 68.385(13) 3 1\_545 ?  
Eu2 Eu2 Eu1 68.385(13) 3\_556 1\_545 ?  
O Eu2 Eu3 95.99(14) . 13\_556 ?  
O Eu2 Eu3 31.27(5) 10\_556 13\_556 ?  
I4 Eu2 Eu3 61.881(14) . 13\_556 ?  
Eu3 Eu2 Eu3 63.578(18) 15\_545 13\_556 ?  
I1 Eu2 Eu3 122.514(15) . 13\_556 ?  
I4 Eu2 Eu3 52.963(15) 13\_556 13\_556 ?  
I4 Eu2 Eu3 130.37(2) 13 13\_556 ?  
Eu2 Eu2 Eu3 129.061(18) 3 13\_556 ?  
Eu2 Eu2 Eu3 54.775(9) 3\_556 13\_556 ?  
Eu1 Eu2 Eu3 122.941(13) 1\_545 13\_556 ?  
O Eu2 Eu3 31.27(5) . 13 ?  
O Eu2 Eu3 95.99(14) 10\_556 13 ?  
I4 Eu2 Eu3 61.881(14) . 13 ?  
Eu3 Eu2 Eu3 63.578(18) 15\_545 13 ?  
I1 Eu2 Eu3 122.514(15) . 13 ?  
I4 Eu2 Eu3 130.37(2) 13\_556 13 ?  
I4 Eu2 Eu3 52.963(15) 13 13 ?  
Eu2 Eu2 Eu3 54.775(9) 3 13 ?  
Eu2 Eu2 Eu3 129.061(18) 3\_556 13 ?  
Eu1 Eu2 Eu3 122.941(13) 1\_545 13 ?  
Eu3 Eu2 Eu3 98.24(2) 13\_556 13 ?

O Eu2 H 78(3) . . ?  
O Eu2 H 124.1(10) 10\_556 . ?  
I4 Eu2 H 140.9(9) . . ?  
Eu3 Eu2 H 99(2) 15\_545 . ?  
I1 Eu2 H 71(2) . . ?  
I4 Eu2 H 135(3) 13\_556 . ?  
I4 Eu2 H 73.0(4) 13 . ?  
Eu2 Eu2 H 41(3) 3 . ?  
Eu2 Eu2 H 102.0(5) 3\_556 . ?  
Eu1 Eu2 H 37.4(16) 1\_545 . ?  
Eu3 Eu2 H 154.6(5) 13\_556 . ?  
Eu3 Eu2 H 89(2) 13 . ?  
O Eu3 O 81.36(17) 6 13 ?  
O Eu3 I3B 82.2(2) 6 10\_556 ?  
O Eu3 I3B 109.7(2) 13 10\_556 ?  
O Eu3 I3B 109.7(2) 6 . ?  
O Eu3 I3B 82.2(2) 13 . ?  
I3B Eu3 I3B 42.6(4) 10\_556 . ?  
O Eu3 I3A 99.44(18) 6 . ?  
O Eu3 I3A 84.49(18) 13 . ?  
I3B Eu3 I3A 33.2(3) 10\_556 . ?  
I3B Eu3 I3A 11.13(16) . . ?  
O Eu3 I3A 84.49(18) 6 10\_556 ?  
O Eu3 I3A 99.44(18) 13 10\_556 ?  
I3B Eu3 I3A 11.13(16) 10\_556 10\_556 ?  
I3B Eu3 I3A 33.2(3) . 10\_556 ?  
I3A Eu3 I3A 23.0(2) . 10\_556 ?  
O Eu3 I3B 125.5(2) 6 9\_565 ?  
O Eu3 I3B 80.7(2) 13 9\_565 ?  
I3B Eu3 I3B 57.05(5) 10\_556 9\_565 ?  
I3B Eu3 I3B 16.8(4) . 9\_565 ?  
I3A Eu3 I3B 27.9(3) . 9\_565 ?  
I3A Eu3 I3B 48.95(16) 10\_556 9\_565 ?  
O Eu3 I3B 80.7(2) 6 2\_565 ?  
O Eu3 I3B 125.5(2) 13 2\_565 ?  
I3B Eu3 I3B 16.8(4) 10\_556 2\_565 ?  
I3B Eu3 I3B 57.05(5) . 2\_565 ?  
I3A Eu3 I3B 48.95(16) . 2\_565 ?  
I3A Eu3 I3B 27.9(3) 10\_556 2\_565 ?  
I3B Eu3 I3B 69.4(3) 9\_565 2\_565 ?  
O Eu3 I2 90.61(17) 6 . ?  
O Eu3 I2 90.61(17) 13 . ?  
I3B Eu3 I2 22.5(2) 10\_556 . ?  
I3B Eu3 I2 22.5(2) . . ?  
I3A Eu3 I2 11.65(12) . . ?  
I3A Eu3 I2 11.65(12) 10\_556 . ?  
I3B Eu3 I2 38.92(19) 9\_565 . ?

I3B Eu3 I2 38.92(19) 2\_565 . ?  
 O Eu3 I4 83.56(16) 6 . ?  
 O Eu3 I4 83.56(16) 13 . ?  
 I3B Eu3 I4 158.71(18) 10\_556 . ?  
 I3B Eu3 I4 158.71(18) . . ?  
 I3A Eu3 I4 167.10(9) . . ?  
 I3A Eu3 I4 167.10(9) 10\_556 . ?  
 I3B Eu3 I4 143.77(18) 9\_565 . ?  
 I3B Eu3 I4 143.77(18) 2\_565 . ?  
 I2 Eu3 I4 172.30(9) . . ?  
 O Eu3 I3A 134.23(14) 6 9\_565 ?  
 O Eu3 I3A 79.27(17) 13 9\_565 ?  
 I3B Eu3 I3A 66.36(13) 10\_556 9\_565 ?  
 I3B Eu3 I3A 26.7(3) . 9\_565 ?  
 I3A Eu3 I3A 37.8(2) . 9\_565 ?  
 I3A Eu3 I3A 58.70(6) 10\_556 9\_565 ?  
 I3B Eu3 I3A 9.95(15) 9\_565 9\_565 ?  
 I3B Eu3 I3A 77.7(2) 2\_565 9\_565 ?  
 I2 Eu3 I3A 48.85(11) . 9\_565 ?  
 I4 Eu3 I3A 134.11(10) . 9\_565 ?  
 O Eu3 I3A 79.27(17) 6 2\_565 ?  
 O Eu3 I3A 134.23(14) 13 2\_565 ?  
 I3B Eu3 I3A 26.7(3) 10\_556 2\_565 ?  
 I3B Eu3 I3A 66.36(13) . 2\_565 ?  
 I3A Eu3 I3A 58.70(6) . 2\_565 ?  
 I3A Eu3 I3A 37.8(2) 10\_556 2\_565 ?  
 I3B Eu3 I3A 77.7(2) 9\_565 2\_565 ?  
 I3B Eu3 I3A 9.95(15) 2\_565 2\_565 ?  
 I2 Eu3 I3A 48.85(11) . 2\_565 ?  
 I4 Eu3 I3A 134.11(10) . 2\_565 ?  
 I3A Eu3 I3A 85.35(17) 9\_565 2\_565 ?  
 Eu3 O Eu3 119.7(3) 15\_545 13 ?  
 Eu3 O Eu2 116.49(4) 15\_545 3 ?  
 Eu3 O Eu2 99.41(3) 13 3 ?  
 Eu3 O Eu2 99.41(3) 15\_545 . ?  
 Eu3 O Eu2 116.49(4) 13 . ?  
 Eu2 O Eu2 105.2(3) 3 . ?  
 Eu1 I1 Eu1 120.00(5) 9\_565 9\_566 ?  
 Eu1 I1 Eu3 110.925(13) 9\_565 11 ?  
 Eu1 I1 Eu3 110.925(13) 9\_566 11 ?  
 Eu1 I1 Eu3 110.925(13) 9\_565 . ?  
 Eu1 I1 Eu3 110.925(13) 9\_566 . ?  
 Eu3 I1 Eu3 88.83(3) 11 . ?  
 Eu1 I1 Eu2 75.118(19) 9\_565 . ?  
 Eu1 I1 Eu2 75.118(19) 9\_566 . ?  
 Eu3 I1 Eu2 165.32(3) 11 . ?  
 Eu3 I1 Eu2 76.492(16) . . ?

Eu1 I1 Eu2 75.118(19) 9\_565 11 ?  
Eu1 I1 Eu2 75.118(19) 9\_566 11 ?  
Eu3 I1 Eu2 76.492(16) 11 11 ?  
Eu3 I1 Eu2 165.32(3) . 11 ?  
Eu2 I1 Eu2 118.19(4) . 11 ?  
I3A I2 I3A 156.7(15) 10\_556 . ?  
I3A I2 I3B 145.0(11) 10\_556 . ?  
I3A I2 I3B 11.8(7) . . ?  
I3A I2 I3B 11.8(7) 10\_556 10\_556 ?  
I3A I2 I3B 145.0(11) . 10\_556 ?  
I3B I2 I3B 133.2(8) . 10\_556 ?  
I3A I2 I3B 136.8(9) 10\_556 9\_565 ?  
I3A I2 I3B 19.9(7) . 9\_565 ?  
I3B I2 I3B 8.2(5) . 9\_565 ?  
I3B I2 I3B 125.0(4) 10\_556 9\_565 ?  
I3A I2 I3B 19.9(7) 10\_556 2\_565 ?  
I3A I2 I3B 136.8(9) . 2\_565 ?  
I3B I2 I3B 125.0(4) . 2\_565 ?  
I3B I2 I3B 8.2(5) 10\_556 2\_565 ?  
I3B I2 I3B 116.9(5) 9\_565 2\_565 ?  
I3A I2 I3A 135.8(8) 10\_556 9\_565 ?  
I3A I2 I3A 20.9(7) . 9\_565 ?  
I3B I2 I3A 9.1(4) . 9\_565 ?  
I3B I2 I3A 124.1(5) 10\_556 9\_565 ?  
I3B I2 I3A 1.0(2) 9\_565 9\_565 ?  
I3B I2 I3A 115.9(3) 2\_565 9\_565 ?  
I3A I2 I3A 20.9(7) 10\_556 2\_565 ?  
I3A I2 I3A 135.8(8) . 2\_565 ?  
I3B I2 I3A 124.1(5) . 2\_565 ?  
I3B I2 I3A 9.1(4) 10\_556 2\_565 ?  
I3B I2 I3A 115.9(3) 9\_565 2\_565 ?  
I3B I2 I3A 1.0(2) 2\_565 2\_565 ?  
I3A I2 I3A 114.9(2) 9\_565 2\_565 ?  
I3A I2 Eu3 82.5(5) 10\_556 . ?  
I3A I2 Eu3 82.4(5) . . ?  
I3B I2 Eu3 75.0(3) . . ?  
I3B I2 Eu3 75.0(3) 10\_556 . ?  
I3B I2 Eu3 70.06(17) 9\_565 . ?  
I3B I2 Eu3 70.06(17) 2\_565 . ?  
I3A I2 Eu3 69.50(10) 9\_565 . ?  
I3A I2 Eu3 69.50(10) 2\_565 . ?  
I3A I2 Eu3 82.5(5) 10\_556 11 ?  
I3A I2 Eu3 82.4(5) . 11 ?  
I3B I2 Eu3 75.0(3) . 11 ?  
I3B I2 Eu3 75.0(3) 10\_556 11 ?  
I3B I2 Eu3 70.06(17) 9\_565 11 ?  
I3B I2 Eu3 70.06(17) 2\_565 11 ?

I3A I2 Eu3 69.50(10) 9\_565 11 ?  
I3A I2 Eu3 69.50(10) 2\_565 11 ?  
Eu3 I2 Eu3 98.70(17) . 11 ?  
I3B I3A I2 155.8(13) . . ?  
I3B I3A I3A 144.2(8) . 10\_556 ?  
I2 I3A I3A 11.6(8) . 10\_556 ?  
I3B I3A I3B 4.0(10) . 9\_565 ?  
I2 I3A I3B 151.8(9) . 9\_565 ?  
I3A I3A I3B 140.1(3) 10\_556 9\_565 ?  
I3B I3A I3B 132.7(11) . 10\_556 ?  
I2 I3A I3B 23.1(7) . 10\_556 ?  
I3A I3A I3B 11.5(3) 10\_556 10\_556 ?  
I3B I3A I3B 128.6(3) 9\_565 10\_556 ?  
I3B I3A I3A 2.9(7) . 9\_565 ?  
I2 I3A I3A 152.9(9) . 9\_565 ?  
I3A I3A I3A 141.3(2) 10\_556 9\_565 ?  
I3B I3A I3A 1.1(3) 9\_565 9\_565 ?  
I3B I3A I3A 129.8(4) 10\_556 9\_565 ?  
I3B I3A I3B 122.3(7) . 2\_565 ?  
I2 I3A I3B 33.5(7) . 2\_565 ?  
I3A I3A I3B 21.9(2) 10\_556 2\_565 ?  
I3B I3A I3B 118.3(4) 9\_565 2\_565 ?  
I3B I3A I3B 10.4(4) 10\_556 2\_565 ?  
I3A I3A I3B 119.4(3) 9\_565 2\_565 ?  
I3B I3A I2 3.3(8) . 9\_565 ?  
I2 I3A I2 159.1(7) . 9\_565 ?  
I3A I3A I2 147.47(12) 10\_556 9\_565 ?  
I3B I3A I2 7.3(3) 9\_565 9\_565 ?  
I3B I3A I2 136.0(3) 10\_556 9\_565 ?  
I3A I3A I2 6.2(2) 9\_565 9\_565 ?  
I3B I3A I2 125.6(3) 2\_565 9\_565 ?  
I3B I3A Eu3 78.6(5) . . ?  
I2 I3A Eu3 85.9(5) . . ?  
I3A I3A Eu3 78.50(12) 10\_556 . ?  
I3B I3A Eu3 76.08(19) 9\_565 . ?  
I3B I3A Eu3 71.46(19) 10\_556 . ?  
I3A I3A Eu3 76.79(17) 9\_565 . ?  
I3B I3A Eu3 65.54(11) 2\_565 . ?  
I2 I3A Eu3 80.67(14) 9\_565 . ?  
I3B I3A Eu3 78.6(5) . 11 ?  
I2 I3A Eu3 85.9(5) . 11 ?  
I3A I3A Eu3 78.50(11) 10\_556 11 ?  
I3B I3A Eu3 76.08(19) 9\_565 11 ?  
I3B I3A Eu3 71.46(19) 10\_556 11 ?  
I3A I3A Eu3 76.79(17) 9\_565 11 ?  
I3B I3A Eu3 65.54(11) 2\_565 11 ?  
I2 I3A Eu3 80.67(14) 9\_565 11 ?



Eu3 I3A Eu3 99.53(13) . 11 ?  
I3B I3A Eu3 63.6(5) . 9\_565 ?  
I2 I3A Eu3 128.9(3) . 9\_565 ?  
I3A I3A Eu3 132.67(8) 10\_556 9\_565 ?  
I3B I3A Eu3 66.1(2) 9\_565 9\_565 ?  
I3B I3A Eu3 134.43(7) 10\_556 9\_565 ?  
I3A I3A Eu3 65.38(18) 9\_565 9\_565 ?  
I3B I3A Eu3 134.11(6) 2\_565 9\_565 ?  
I2 I3A Eu3 61.65(12) 9\_565 9\_565 ?  
Eu3 I3A Eu3 142.2(2) . 9\_565 ?  
Eu3 I3A Eu3 72.63(6) 11 9\_565 ?  
I3B I3A Eu3 63.6(5) . 3\_565 ?  
I2 I3A Eu3 128.9(3) . 3\_565 ?  
I3A I3A Eu3 132.67(9) 10\_556 3\_565 ?  
I3B I3A Eu3 66.1(2) 9\_565 3\_565 ?  
I3B I3A Eu3 134.43(7) 10\_556 3\_565 ?  
I3A I3A Eu3 65.38(18) 9\_565 3\_565 ?  
I3B I3A Eu3 134.11(6) 2\_565 3\_565 ?  
I2 I3A Eu3 61.65(12) 9\_565 3\_565 ?  
Eu3 I3A Eu3 72.63(6) . 3\_565 ?  
Eu3 I3A Eu3 142.2(2) 11 3\_565 ?  
Eu3 I3A Eu3 90.94(14) 9\_565 3\_565 ?  
I3A I3B I3B 173.3(16) . 9\_565 ?  
I3A I3B I2 12.4(7) . . ?  
I3B I3B I2 160.9(12) 9\_565 . ?  
I3A I3B I3A 176.0(10) . 9\_565 ?  
I3B I3B I3A 2.7(6) 9\_565 9\_565 ?  
I2 I3B I3A 163.6(6) . 9\_565 ?  
I3A I3B I3A 24.3(6) . 10\_556 ?  
I3B I3B I3A 149.0(11) 9\_565 10\_556 ?  
I2 I3B I3A 11.9(3) . 10\_556 ?  
I3A I3B I3A 151.6(5) 9\_565 10\_556 ?  
I3A I3B I2 175.7(10) . 9\_565 ?  
I3B I3B I2 11.0(7) 9\_565 9\_565 ?  
I2 I3B I2 171.8(5) . 9\_565 ?  
I3A I3B I2 8.3(3) 9\_565 9\_565 ?  
I3A I3B I2 159.9(5) 10\_556 9\_565 ?  
I3A I3B I3B 35.8(8) . 10\_556 ?  
I3B I3B I3B 137.5(9) 9\_565 10\_556 ?  
I2 I3B I3B 23.4(4) . 10\_556 ?  
I3A I3B I3B 140.1(3) 9\_565 10\_556 ?  
I3A I3B I3B 11.5(3) 10\_556 10\_556 ?  
I2 I3B I3B 148.4(2) 9\_565 10\_556 ?  
I3A I3B I3A 166.0(9) . 2\_564 ?  
I3B I3B I3A 20.6(8) 9\_565 2\_564 ?  
I2 I3B I3A 178.5(6) . 2\_564 ?  
I3A I3B I3A 18.0(3) 9\_565 2\_564 ?

I3A I3B I3A 169.6(4) 10\_556 2\_564 ?  
I2 I3B I3A 9.7(2) 9\_565 2\_564 ?  
I3B I3B I3A 158.1(2) 10\_556 2\_564 ?  
I3A I3B I3B 156.1(10) . 2\_564 ?  
I3B I3B I3B 30.6(7) 9\_565 2\_564 ?  
I2 I3B I3B 168.5(7) . 2\_564 ?  
I3A I3B I3B 27.9(3) 9\_565 2\_564 ?  
I3A I3B I3B 179.6(5) 10\_556 2\_564 ?  
I2 I3B I3B 19.6(3) 9\_565 2\_564 ?  
I3B I3B I3B 168.0(3) 10\_556 2\_564 ?  
I3A I3B I3B 9.93(16) 2\_564 2\_564 ?  
I3A I3B I3B 47.8(7) . 2\_565 ?  
I3B I3B I3B 125.5(11) 9\_565 2\_565 ?  
I2 I3B I3B 35.4(3) . 2\_565 ?  
I3A I3B I3B 128.2(5) 9\_565 2\_565 ?  
I3A I3B I3B 23.5(2) 10\_556 2\_565 ?  
I2 I3B I3B 136.5(5) 9\_565 2\_565 ?  
I3B I3B I3B 11.9(3) 10\_556 2\_565 ?  
I3A I3B I3B 146.2(5) 2\_564 2\_565 ?  
I3B I3B I3B 156.1(6) 2\_564 2\_565 ?  
I3A I3B Eu3 90.3(5) . . ?  
I3B I3B Eu3 85.5(6) 9\_565 . ?  
I2 I3B Eu3 82.5(3) . . ?  
I3A I3B Eu3 87.2(3) 9\_565 . ?  
I3A I3B Eu3 75.3(2) 10\_556 . ?  
I2 I3B Eu3 92.4(3) 9\_565 . ?  
I3B I3B Eu3 68.71(18) 10\_556 . ?  
I3A I3B Eu3 98.4(3) 2\_564 . ?  
I3B I3B Eu3 104.4(4) 2\_564 . ?  
I3B I3B Eu3 62.54(17) 2\_565 . ?  
I3A I3B Eu3 90.3(5) . 11 ?  
I3B I3B Eu3 85.5(6) 9\_565 11 ?  
I2 I3B Eu3 82.5(3) . 11 ?  
I3A I3B Eu3 87.2(3) 9\_565 11 ?  
I3A I3B Eu3 75.3(2) 10\_556 11 ?  
I2 I3B Eu3 92.4(3) 9\_565 11 ?  
I3B I3B Eu3 68.71(18) 10\_556 11 ?  
I3A I3B Eu3 98.4(3) 2\_564 11 ?  
I3B I3B Eu3 104.4(4) 2\_564 11 ?  
I3B I3B Eu3 62.54(17) 2\_565 11 ?  
Eu3 I3B Eu3 102.3(2) . 11 ?  
Eu2 I4 Eu1 166.77(4) . 5\_545 ?  
Eu2 I4 Eu3 80.76(2) . . ?  
Eu1 I4 Eu3 112.47(3) 5\_545 . ?  
Eu2 I4 Eu2 111.395(17) . 13\_556 ?  
Eu1 I4 Eu2 75.10(2) 5\_545 13\_556 ?  
Eu3 I4 Eu2 68.630(18) . 13\_556 ?

Eu2 I4 Eu2 111.395(17) . 13 ?

Eu1 I4 Eu2 75.10(2) 5\_545 13 ?

Eu3 I4 Eu2 68.630(18) . 13 ?

Eu2 I4 Eu2 111.51(3) 13\_556 13 ?

\_diffn\_measured\_fraction\_theta\_max 1.000

\_diffn\_refl\_theta\_full 27.88

\_diffn\_measured\_fraction\_theta\_full 1.000

\_refine\_diff\_density\_max 4.203

\_refine\_diff\_density\_min -2.860

\_refine\_diff\_density\_rms 0.491

\_audit\_creation\_method        SHELXL-97

\_chemical\_name\_systematic

;

?

;

\_chemical\_name\_common        ?

\_chemical\_melting\_point      ?

\_chemical\_formula\_moiety     ?

\_chemical\_formula\_sum

'Eu5 H2 I4 O2'

\_chemical\_formula\_weight     1301.42

loop\_

\_atom\_type\_symbol

\_atom\_type\_description

\_atom\_type\_scatter\_dispersion\_real

\_atom\_type\_scatter\_dispersion\_imag

\_atom\_type\_scatter\_source

'Eu' 'Eu' -0.1578 3.6682

'International Tables Vol C Tables 4.2.6.8 and 6.1.1.4'

'H' 'H' 0.0000 0.0000

'International Tables Vol C Tables 4.2.6.8 and 6.1.1.4'

'O' 'O' 0.0106 0.0060

'International Tables Vol C Tables 4.2.6.8 and 6.1.1.4'

'I' 'I' -0.4742 1.8119

'International Tables Vol C Tables 4.2.6.8 and 6.1.1.4'

\_symmetry\_cell\_setting        orthorhombic

\_symmetry\_space\_group\_name\_H-M   Cmc21

loop\_

\_symmetry\_equiv\_pos\_as\_xyz

'x, y, z'

'-x, -y, z+1/2'

'x, -y, -z'

'-x, y, -z+1/2'

'x+1/2, y+1/2, z'

'-x+1/2, -y+1/2, z+1/2'

'x+1/2, -y+1/2, -z'

'-x+1/2, y+1/2, -z+1/2'

'-x, -y, -z'

'x, y, -z-1/2'

'-x, y, z'

'x, -y, z-1/2'

'-x+1/2, -y+1/2, -z'

'x+1/2, y+1/2, -z-1/2'

'-x+1/2, y+1/2, z'

'x+1/2, -y+1/2, z-1/2'

\_cell\_length\_a 16.3697(9)  
\_cell\_length\_b 13.6954(8)  
\_cell\_length\_c 6.0436(4)  
\_cell\_angle\_alpha 90.00  
\_cell\_angle\_beta 90.00  
\_cell\_angle\_gamma 90.00  
\_cell\_volume 1354.91(14)  
\_cell\_formula\_units\_Z 4  
\_cell\_measurement\_temperature 100(2)  
\_cell\_measurement\_reflns\_used 1695  
\_cell\_measurement\_theta\_min 0.41  
\_cell\_measurement\_theta\_max 34.97

\_exptl\_crystal\_description 'lath shaped'  
\_exptl\_crystal\_colour 'red'  
\_exptl\_crystal\_size\_max 0.220  
\_exptl\_crystal\_size\_mid 0.085  
\_exptl\_crystal\_size\_min 0.048  
\_exptl\_crystal\_density\_meas ?  
\_exptl\_crystal\_density\_diffn 6.380  
\_exptl\_crystal\_density\_method 'not measured'  
\_exptl\_crystal\_F\_000 2180  
\_exptl\_absorpt\_coefficient\_mu 31.880  
\_exptl\_absorpt\_correction\_type empirical  
\_exptl\_absorpt\_correction\_T\_min 0.001  
\_exptl\_absorpt\_correction\_T\_max 0.220  
\_exptl\_absorpt\_process\_details 'SCALEPACK (W. Minor & Z. Otwinowski)'

\_exptl\_special\_details

;  
?  
;

\_diffn\_ambient\_temperature 100(2)  
\_diffn\_radiation\_wavelength 0.71069  
\_diffn\_radiation\_type MoK $\alpha$   
\_diffn\_radiation\_source 'fine-focus sealed tube'  
\_diffn\_radiation\_monochromator graphite  
\_diffn\_measurement\_device\_type 'Kappa CCD (Nonius)'  
\_diffn\_measurement\_method 'four circle, CCD'  
\_diffn\_detector\_area\_resol\_mean ?  
\_diffn\_standards\_number ?  
\_diffn\_standards\_interval\_count ?  
\_diffn\_standards\_interval\_time ?  
\_diffn\_standards\_decay\_% ?

```

_diffrn_reflms_number      2931
_diffrn_reflms_av_R_equivalents  0.0643
_diffrn_reflms_av_signal/netl  0.0298
_diffrn_reflms_limit_h_min    -26
_diffrn_reflms_limit_h_max    26
_diffrn_reflms_limit_k_min    -22
_diffrn_reflms_limit_k_max    22
_diffrn_reflms_limit_l_min    -9
_diffrn_reflms_limit_l_max    9
_diffrn_reflms_theta_min      1.94
_diffrn_reflms_theta_max      34.96
_reflms_number_total         1645
_reflms_number_gt            1449
_reflms_threshold_expression  >2sigma(I)

```

```

_computing_data_collection    'Nonius Collect-Software'
_computing_cell_refinement     'Denzo (W. Minor & Z. Otwinowski)'
_computing_data_reduction     'Denzo (W. Minor & Z. Otwinowski)'
_computing_structure_solution  'SHELXS-97 (Sheldrick, 1990)'
_computing_structure_refinement 'SHELXL-97 (Sheldrick, 1997)'
_computing_molecular_graphics  ?
_computing_publication_material ?

```

```
_refine_special_details
```

```
;
```

Refinement of  $F^2$  against ALL reflections. The weighted R-factor wR and goodness of fit S are based on  $F^2$ , conventional R-factors R are based on F, with F set to zero for negative  $F^2$ . The threshold expression of  $F^2 > 2\sigma(F^2)$  is used only for calculating R-factors(gt) etc. and is not relevant to the choice of reflections for refinement. R-factors based on  $F^2$  are statistically about twice as large as those based on F, and R-factors based on ALL data will be even larger.

```
;
```

```

_refine_ls_structure_factor_coef Fsqd
_refine_ls_matrix_type          full
_refine_ls_weighting_scheme     calc
_refine_ls_weighting_details
'calc w=1/[\s^2*(Fo^2)+(0.0504P)^2+34.6527P] where P=(Fo^2+2Fc^2)/3'
_atom_sites_solution_primary    direct
_atom_sites_solution_secondary  difmap
_refine_ls_extinction_method     SHELXL
_refine_ls_extinction_coef       0.00087(5)
_refine_ls_extinction_expression
'Fc*^=kFc[1+0.001xFc^2\l^3/sin(2\q)]^-1/4'
_refine_ls_number_reflms        1645
_refine_ls_number_parameters    46

```

\_refine\_ls\_number\_restraints 0  
 \_refine\_ls\_R\_factor\_all 0.0415  
 \_refine\_ls\_R\_factor\_gt 0.0357  
 \_refine\_ls\_wR\_factor\_ref 0.0921  
 \_refine\_ls\_wR\_factor\_gt 0.0893  
 \_refine\_ls\_goodness\_of\_fit\_ref 1.090  
 \_refine\_ls\_restrained\_S\_all 1.090  
 \_refine\_ls\_shift/su\_max 0.000  
 \_refine\_ls\_shift/su\_mean 0.000

loop\_

\_atom\_site\_label  
 \_atom\_site\_type\_symbol  
 \_atom\_site\_fract\_x  
 \_atom\_site\_fract\_y  
 \_atom\_site\_fract\_z  
 \_atom\_site\_U\_iso\_or\_equiv  
 \_atom\_site\_adp\_type  
 \_atom\_site\_occupancy  
 \_atom\_site\_symmetry\_multiplicity  
 \_atom\_site\_calc\_flag  
 \_atom\_site\_refinement\_flags  
 \_atom\_site\_disorder\_assembly  
 \_atom\_site\_disorder\_group

Eu1 Eu 0.0000 0.90892(4) 0.2500 0.00730(13) Uani 1 4 d S . .  
 Eu2 Eu 0.18814(2) 0.08380(3) 0.2500 0.00497(11) Uani 1 2 d S . .  
 Eu3 Eu 0.15203(2) 0.40322(3) 0.2500 0.00665(11) Uani 1 2 d S . .  
 O O 0.2762(3) 0.0000 0.0000 0.0076(10) Uani 1 2 d S . .  
 H H 0.090(7) 0.0000 0.0000 0.019 Uiso 1 2 d S . .  
 I1 I 0.0000 0.21783(6) 0.2500 0.00813(15) Uani 1 4 d S . .  
 I2 I 0.0000 0.5589(4) 0.2500 0.017(2) Uani 0.232(15) 4 d SP . .  
 I3 I 0.0000 0.5436(4) 0.1192(15) 0.047(2) Uani 0.377(9) 2 d SP . .  
 I4 I 0.32809(3) 0.26778(4) 0.2500 0.00756(12) Uani 1 2 d S . .

loop\_

\_atom\_site\_aniso\_label  
 \_atom\_site\_aniso\_U\_11  
 \_atom\_site\_aniso\_U\_22  
 \_atom\_site\_aniso\_U\_33  
 \_atom\_site\_aniso\_U\_23  
 \_atom\_site\_aniso\_U\_13  
 \_atom\_site\_aniso\_U\_12

Eu1 0.0062(2) 0.0025(2) 0.0133(3) 0.000 0.000 0.000  
 Eu2 0.00428(16) 0.00080(16) 0.00982(19) 0.000 0.000 0.00070(12)  
 Eu3 0.00314(17) 0.00306(18) 0.0138(2) 0.000 0.000 -0.00106(11)  
 O 0.007(2) 0.004(2) 0.012(3) -0.001(2) 0.000 0.000  
 I1 0.0045(3) 0.0100(3) 0.0099(3) 0.000 0.000 0.000

I2 0.0130(18) 0.018(2) 0.020(5) 0.000 0.000 0.000  
 I3 0.0142(9) 0.0391(17) 0.089(5) 0.042(3) 0.000 0.000  
 I4 0.0049(2) 0.0058(2) 0.0120(2) 0.000 0.000 -0.00293(15)

\_geom\_special\_details

;

All esds (except the esd in the dihedral angle between two l.s. planes)  
 are estimated using the full covariance matrix. The cell esds are taken  
 into account individually in the estimation of esds in distances, angles  
 and torsion angles; correlations between esds in cell parameters are only  
 used when they are defined by crystal symmetry. An approximate (isotropic)  
 treatment of cell esds is used for estimating esds involving l.s. planes.

;

loop\_

\_geom\_bond\_atom\_site\_label\_1

\_geom\_bond\_atom\_site\_label\_2

\_geom\_bond\_distance

\_geom\_bond\_site\_symmetry\_2

\_geom\_bond\_publ\_flag

Eu1 I4 3.4141(6) 5\_455 ?

Eu1 I4 3.4141(6) 15 ?

Eu1 I1 3.4849(5) 9\_565 ?

Eu1 I1 3.4849(5) 9\_566 ?

Eu1 Eu2 3.9015(6) 1\_565 ?

Eu1 Eu2 3.9015(6) 11\_565 ?

Eu1 Eu1 3.9187(7) 9\_576 ?

Eu1 Eu1 3.9187(7) 9\_575 ?

Eu1 Eu2 4.3158(3) 3\_566 ?

Eu1 Eu2 4.3158(3) 9\_565 ?

Eu1 Eu2 4.3158(3) 9\_566 ?

Eu1 Eu2 4.3158(3) 3\_565 ?

Eu2 O 2.383(3) . ?

Eu2 O 2.383(3) 10\_556 ?

Eu2 I4 3.4054(6) . ?

Eu2 I1 3.5853(6) . ?

Eu2 Eu3 3.6002(6) 15\_545 ?

Eu2 I4 3.6516(4) 13\_556 ?

Eu2 I4 3.6516(4) 13 ?

Eu2 Eu2 3.7946(5) 3 ?

Eu2 Eu2 3.7946(5) 3\_556 ?

Eu2 Eu1 3.9015(6) 1\_545 ?

Eu2 Eu3 4.0010(4) 13\_556 ?

Eu2 Eu3 4.0010(4) 13 ?

Eu2 H 2.49(7) . ?

Eu3 O 2.328(3) 6 ?

Eu3 O 2.328(3) 13 ?



Eu3 I3 3.2426(16) 10\_556 ?

Eu3 I3 3.2426(16) . ?

Eu3 I2 3.277(3) . ?

Eu3 I3 3.421(5) 9\_565 ?

Eu3 I3 3.421(5) 2\_565 ?

Eu3 I4 3.4273(7) . ?

Eu3 I1 3.5554(7) . ?

Eu3 Eu2 3.6001(6) 15 ?

Eu3 Eu2 4.0010(4) 13\_556 ?

Eu3 Eu2 4.0010(4) 13 ?

O Eu3 2.328(3) 15\_545 ?

O Eu3 2.328(3) 13 ?

O Eu2 2.383(3) 3 ?

I1 Eu1 3.4848(5) 9\_565 ?

I1 Eu1 3.4848(5) 9\_566 ?

I1 Eu3 3.5553(7) 11 ?

I1 Eu2 3.5854(6) 11 ?

I2 I3 0.818(10) 10\_556 ?

I2 I3 0.818(10) . ?

I2 I3 2.636(9) 9\_565 ?

I2 I3 2.636(9) 2\_565 ?

I2 Eu3 3.277(3) 11 ?

I3 I3 1.581(18) 10\_556 ?

I3 I3 1.87(2) 9\_565 ?

I3 I2 2.636(9) 9\_565 ?

I3 Eu3 3.2426(16) 11 ?

I3 Eu3 3.421(5) 9\_565 ?

I3 Eu3 3.421(5) 3\_565 ?

I4 Eu1 3.4141(6) 5\_545 ?

I4 Eu2 3.6516(4) 13\_556 ?

I4 Eu2 3.6516(4) 13 ?

loop\_

\_geom\_angle\_atom\_site\_label\_1

\_geom\_angle\_atom\_site\_label\_2

\_geom\_angle\_atom\_site\_label\_3

\_geom\_angle

\_geom\_angle\_site\_symmetry\_1

\_geom\_angle\_site\_symmetry\_3

\_geom\_angle\_publ\_flag

I4 Eu1 I4 111.03(2) 5\_455 15 ?

I4 Eu1 I1 73.620(11) 5\_455 9\_565 ?

I4 Eu1 I1 73.620(11) 15 9\_565 ?

I4 Eu1 I1 73.620(11) 5\_455 9\_566 ?

I4 Eu1 I1 73.620(11) 15 9\_566 ?

I1 Eu1 I1 120.25(3) 9\_565 9\_566 ?

I4 Eu1 Eu2 176.613(19) 5\_455 1\_565 ?

I4 Eu1 Eu2 72.354(12) 15 1\_565 ?  
I1 Eu1 Eu2 107.805(7) 9\_565 1\_565 ?  
I1 Eu1 Eu2 107.805(7) 9\_566 1\_565 ?  
I4 Eu1 Eu2 72.354(12) 5\_455 11\_565 ?  
I4 Eu1 Eu2 176.613(19) 15 11\_565 ?  
I1 Eu1 Eu2 107.805(7) 9\_565 11\_565 ?  
I1 Eu1 Eu2 107.805(7) 9\_566 11\_565 ?  
Eu2 Eu1 Eu2 104.259(19) 1\_565 11\_565 ?  
I4 Eu1 Eu1 111.129(6) 5\_455 9\_576 ?  
I4 Eu1 Eu1 111.129(6) 15 9\_576 ?  
I1 Eu1 Eu1 170.33(2) 9\_565 9\_576 ?  
I1 Eu1 Eu1 69.419(13) 9\_566 9\_576 ?  
Eu2 Eu1 Eu1 66.993(11) 1\_565 9\_576 ?  
Eu2 Eu1 Eu1 66.993(11) 11\_565 9\_576 ?  
I4 Eu1 Eu1 111.129(6) 5\_455 9\_575 ?  
I4 Eu1 Eu1 111.129(6) 15 9\_575 ?  
I1 Eu1 Eu1 69.419(13) 9\_565 9\_575 ?  
I1 Eu1 Eu1 170.33(2) 9\_566 9\_575 ?  
Eu2 Eu1 Eu1 66.993(11) 1\_565 9\_575 ?  
Eu2 Eu1 Eu1 66.993(11) 11\_565 9\_575 ?  
Eu1 Eu1 Eu1 100.91(3) 9\_576 9\_575 ?  
I4 Eu1 Eu2 126.964(11) 5\_455 3\_566 ?  
I4 Eu1 Eu2 54.892(7) 15 3\_566 ?  
I1 Eu1 Eu2 128.218(10) 9\_565 3\_566 ?  
I1 Eu1 Eu2 53.444(7) 9\_566 3\_566 ?  
Eu2 Eu1 Eu2 54.724(8) 1\_565 3\_566 ?  
Eu2 Eu1 Eu2 123.307(10) 11\_565 3\_566 ?  
Eu1 Eu1 Eu2 56.314(5) 9\_576 3\_566 ?  
Eu1 Eu1 Eu2 121.681(13) 9\_575 3\_566 ?  
I4 Eu1 Eu2 54.892(7) 5\_455 9\_565 ?  
I4 Eu1 Eu2 126.964(11) 15 9\_565 ?  
I1 Eu1 Eu2 53.444(7) 9\_565 9\_565 ?  
I1 Eu1 Eu2 128.218(10) 9\_566 9\_565 ?  
Eu2 Eu1 Eu2 123.307(10) 1\_565 9\_565 ?  
Eu2 Eu1 Eu2 54.724(8) 11\_565 9\_565 ?  
Eu1 Eu1 Eu2 121.681(13) 9\_576 9\_565 ?  
Eu1 Eu1 Eu2 56.314(5) 9\_575 9\_565 ?  
Eu2 Eu1 Eu2 177.349(17) 3\_566 9\_565 ?  
I4 Eu1 Eu2 54.892(7) 5\_455 9\_566 ?  
I4 Eu1 Eu2 126.964(11) 15 9\_566 ?  
I1 Eu1 Eu2 128.218(10) 9\_565 9\_566 ?  
I1 Eu1 Eu2 53.444(7) 9\_566 9\_566 ?  
Eu2 Eu1 Eu2 123.307(10) 1\_565 9\_566 ?  
Eu2 Eu1 Eu2 54.724(8) 11\_565 9\_566 ?  
Eu1 Eu1 Eu2 56.314(5) 9\_576 9\_566 ?  
Eu1 Eu1 Eu2 121.681(13) 9\_575 9\_566 ?  
Eu2 Eu1 Eu2 91.058(9) 3\_566 9\_566 ?

Eu2 Eu1 Eu2 88.880(9) 9\_565 9\_566 ?  
 I4 Eu1 Eu2 126.964(11) 5\_455 3\_565 ?  
 I4 Eu1 Eu2 54.892(7) 15 3\_565 ?  
 I1 Eu1 Eu2 53.444(7) 9\_565 3\_565 ?  
 I1 Eu1 Eu2 128.218(10) 9\_566 3\_565 ?  
 Eu2 Eu1 Eu2 54.724(8) 1\_565 3\_565 ?  
 Eu2 Eu1 Eu2 123.307(10) 11\_565 3\_565 ?  
 Eu1 Eu1 Eu2 121.681(13) 9\_576 3\_565 ?  
 Eu1 Eu1 Eu2 56.314(5) 9\_575 3\_565 ?  
 Eu2 Eu1 Eu2 88.880(9) 3\_566 3\_565 ?  
 Eu2 Eu1 Eu2 91.058(9) 9\_565 3\_565 ?  
 Eu2 Eu1 Eu2 177.349(17) 9\_566 3\_565 ?  
 O Eu2 O 78.69(13) . 10\_556 ?  
 O Eu2 I4 87.09(9) . . ?  
 O Eu2 I4 87.09(9) 10\_556 . ?  
 O Eu2 I1 140.03(8) . . ?  
 O Eu2 I1 140.03(8) 10\_556 . ?  
 I4 Eu2 I1 101.481(17) . . ?  
 O Eu2 Eu3 39.60(5) . 15\_545 ?  
 O Eu2 Eu3 39.60(5) 10\_556 15\_545 ?  
 I4 Eu2 Eu3 91.110(15) . 15\_545 ?  
 I1 Eu2 Eu3 167.409(18) . 15\_545 ?  
 O Eu2 I4 146.79(11) . 13\_556 ?  
 O Eu2 I4 77.73(3) 10\_556 13\_556 ?  
 I4 Eu2 I4 68.718(11) . 13\_556 ?  
 I1 Eu2 I4 69.666(11) . 13\_556 ?  
 Eu3 Eu2 I4 115.802(11) 15\_545 13\_556 ?  
 O Eu2 I4 77.73(3) . 13 ?  
 O Eu2 I4 146.79(11) 10\_556 13 ?  
 I4 Eu2 I4 68.718(11) . 13 ?  
 I1 Eu2 I4 69.666(11) . 13 ?  
 Eu3 Eu2 I4 115.802(11) 15\_545 13 ?  
 I4 Eu2 I4 111.692(19) 13\_556 13 ?  
 O Eu2 Eu2 37.24(11) . 3 ?  
 O Eu2 Eu2 102.33(2) 10\_556 3 ?  
 I4 Eu2 Eu2 116.585(7) . 3 ?  
 I1 Eu2 Eu2 108.040(6) . 3 ?  
 Eu3 Eu2 Eu2 65.450(9) 15\_545 3 ?  
 I4 Eu2 Eu2 174.690(13) 13\_556 3 ?  
 I4 Eu2 Eu2 71.199(9) 13 3 ?  
 O Eu2 Eu2 102.33(2) . 3\_556 ?  
 O Eu2 Eu2 37.24(11) 10\_556 3\_556 ?  
 I4 Eu2 Eu2 116.585(7) . 3\_556 ?  
 I1 Eu2 Eu2 108.040(6) . 3\_556 ?  
 Eu3 Eu2 Eu2 65.450(9) 15\_545 3\_556 ?  
 I4 Eu2 Eu2 71.199(9) 13\_556 3\_556 ?  
 I4 Eu2 Eu2 174.690(13) 13 3\_556 ?

Eu2 Eu2 Eu2 105.563(19) 3 3\_556 ?  
 O Eu2 Eu1 100.49(9) . 1\_545 ?  
 O Eu2 Eu1 100.49(9) 10\_556 1\_545 ?  
 I4 Eu2 Eu1 170.148(17) . 1\_545 ?  
 I1 Eu2 Eu1 68.668(15) . 1\_545 ?  
 Eu3 Eu2 Eu1 98.742(14) 15\_545 1\_545 ?  
 I4 Eu2 Eu1 106.519(11) 13\_556 1\_545 ?  
 I4 Eu2 Eu1 106.518(11) 13 1\_545 ?  
 Eu2 Eu2 Eu1 68.204(9) 3 1\_545 ?  
 Eu2 Eu2 Eu1 68.204(9) 3\_556 1\_545 ?  
 O Eu2 Eu3 96.00(10) . 13\_556 ?  
 O Eu2 Eu3 31.45(4) 10\_556 13\_556 ?  
 I4 Eu2 Eu3 61.785(9) . 13\_556 ?  
 I1 Eu2 Eu3 122.613(9) . 13\_556 ?  
 Eu3 Eu2 Eu3 63.596(11) 15\_545 13\_556 ?  
 I4 Eu2 Eu3 52.974(10) 13\_556 13\_556 ?  
 I4 Eu2 Eu3 130.378(14) 13 13\_556 ?  
 Eu2 Eu2 Eu3 128.926(11) 3 13\_556 ?  
 Eu2 Eu2 Eu3 54.931(7) 3\_556 13\_556 ?  
 Eu1 Eu2 Eu3 122.921(9) 1\_545 13\_556 ?  
 O Eu2 Eu3 31.45(4) . 13 ?  
 O Eu2 Eu3 96.00(10) 10\_556 13 ?  
 I4 Eu2 Eu3 61.785(9) . 13 ?  
 I1 Eu2 Eu3 122.613(9) . 13 ?  
 Eu3 Eu2 Eu3 63.596(11) 15\_545 13 ?  
 I4 Eu2 Eu3 130.378(14) 13\_556 13 ?  
 I4 Eu2 Eu3 52.974(10) 13 13 ?  
 Eu2 Eu2 Eu3 54.931(7) 3 13 ?  
 Eu2 Eu2 Eu3 128.926(11) 3\_556 13 ?  
 Eu1 Eu2 Eu3 122.921(9) 1\_545 13 ?  
 Eu3 Eu2 Eu3 98.095(13) 13\_556 13 ?  
 O Eu2 H 77(2) . . ?  
 O Eu2 H 123.6(8) 10\_556 . ?  
 I4 Eu2 H 140.9(7) . . ?  
 I1 Eu2 H 71.4(18) . . ?  
 Eu3 Eu2 H 98.8(17) 15\_545 . ?  
 I4 Eu2 H 135(2) 13\_556 . ?  
 I4 Eu2 H 73.0(3) 13 . ?  
 Eu2 Eu2 H 40(2) 3 . ?  
 Eu2 Eu2 H 101.8(4) 3\_556 . ?  
 Eu1 Eu2 H 37.5(12) 1\_545 . ?  
 Eu3 Eu2 H 154.4(4) 13\_556 . ?  
 Eu3 Eu2 H 89.1(17) 13 . ?  
 O Eu3 O 80.95(12) 6 13 ?  
 O Eu3 I3 83.76(13) 6 10\_556 ?  
 O Eu3 I3 101.99(18) 13 10\_556 ?  
 O Eu3 I3 101.99(18) 6 . ?

O Eu3 I3 83.76(13) 13 . ?  
I3 Eu3 I3 28.2(3) 10\_556 . ?  
O Eu3 I2 90.72(11) 6 . ?  
O Eu3 I2 90.72(11) 13 . ?  
I3 Eu3 I2 14.40(18) 10\_556 . ?  
I3 Eu3 I2 14.40(18) . . ?  
O Eu3 I3 132.00(14) 6 9\_565 ?  
O Eu3 I3 79.77(12) 13 9\_565 ?  
I3 Eu3 I3 58.29(3) 10\_556 9\_565 ?  
I3 Eu3 I3 32.5(3) . 9\_565 ?  
I2 Eu3 I3 46.29(14) . 9\_565 ?  
O Eu3 I3 79.77(12) 6 2\_565 ?  
O Eu3 I3 132.00(14) 13 2\_565 ?  
I3 Eu3 I3 32.5(3) 10\_556 2\_565 ?  
I3 Eu3 I3 58.29(3) . 2\_565 ?  
I2 Eu3 I3 46.29(14) . 2\_565 ?  
I3 Eu3 I3 81.4(3) 9\_565 2\_565 ?  
O Eu3 I4 83.34(11) 6 . ?  
O Eu3 I4 83.34(11) 13 . ?  
I3 Eu3 I4 165.08(14) 10\_556 . ?  
I3 Eu3 I4 165.08(14) . . ?  
I2 Eu3 I4 172.18(7) . . ?  
I3 Eu3 I4 136.63(15) 9\_565 . ?  
I3 Eu3 I4 136.63(15) 2\_565 . ?  
O Eu3 I1 139.44(7) 6 . ?  
O Eu3 I1 139.44(7) 13 . ?  
I3 Eu3 I1 83.46(7) 10\_556 . ?  
I3 Eu3 I1 83.46(6) . . ?  
I2 Eu3 I1 86.16(7) . . ?  
I3 Eu3 I1 69.07(4) 9\_565 . ?  
I3 Eu3 I1 69.07(4) 2\_565 . ?  
I4 Eu3 I1 101.658(16) . . ?  
O Eu3 Eu2 40.74(7) 6 15 ?  
O Eu3 Eu2 40.74(7) 13 15 ?  
I3 Eu3 Eu2 98.66(6) 10\_556 15 ?  
I3 Eu3 Eu2 98.66(6) . 15 ?  
I2 Eu3 Eu2 96.02(7) . 15 ?  
I3 Eu3 Eu2 112.49(4) 9\_565 15 ?  
I3 Eu3 Eu2 112.49(4) 2\_565 15 ?  
I4 Eu3 Eu2 76.156(14) . 15 ?  
I1 Eu3 Eu2 177.814(16) . 15 ?  
O Eu3 Eu2 32.29(6) 6 13\_556 ?  
O Eu3 Eu2 97.77(10) 13 13\_556 ?  
I3 Eu3 Eu2 106.94(12) 10\_556 13\_556 ?  
I3 Eu3 Eu2 131.27(17) . 13\_556 ?  
I2 Eu3 Eu2 117.88(4) . 13\_556 ?  
I3 Eu3 Eu2 163.51(14) 9\_565 13\_556 ?

I3 Eu3 Eu2 88.49(11) 2\_565 13\_556 ?  
 I4 Eu3 Eu2 58.278(9) . 13\_556 ?  
 I1 Eu3 Eu2 119.306(9) . 13\_556 ?  
 Eu2 Eu3 Eu2 59.619(10) 15 13\_556 ?  
 O Eu3 Eu2 97.77(10) 6 13 ?  
 O Eu3 Eu2 32.29(6) 13 13 ?  
 I3 Eu3 Eu2 131.27(17) 10\_556 13 ?  
 I3 Eu3 Eu2 106.94(12) . 13 ?  
 I2 Eu3 Eu2 117.88(4) . 13 ?  
 I3 Eu3 Eu2 88.49(11) 9\_565 13 ?  
 I3 Eu3 Eu2 163.51(14) 2\_565 13 ?  
 I4 Eu3 Eu2 58.278(9) . 13 ?  
 I1 Eu3 Eu2 119.306(9) . 13 ?  
 Eu2 Eu3 Eu2 59.619(10) 15 13 ?  
 Eu2 Eu3 Eu2 98.097(13) 13\_556 13 ?  
 Eu3 O Eu3 119.4(2) 15\_545 13 ?  
 Eu3 O Eu2 116.27(3) 15\_545 3 ?  
 Eu3 O Eu2 99.67(2) 13 3 ?  
 Eu3 O Eu2 99.67(2) 15\_545 . ?  
 Eu3 O Eu2 116.27(3) 13 . ?  
 Eu2 O Eu2 105.5(2) 3 . ?  
 Eu1 I1 Eu1 120.25(3) 9\_565 9\_566 ?  
 Eu1 I1 Eu3 110.837(8) 9\_565 11 ?  
 Eu1 I1 Eu3 110.837(8) 9\_566 11 ?  
 Eu1 I1 Eu3 110.837(8) 9\_565 . ?  
 Eu1 I1 Eu3 110.837(8) 9\_566 . ?  
 Eu3 I1 Eu3 88.85(2) 11 . ?  
 Eu1 I1 Eu2 75.226(12) 9\_565 . ?  
 Eu1 I1 Eu2 75.226(12) 9\_566 . ?  
 Eu3 I1 Eu2 165.22(2) 11 . ?  
 Eu3 I1 Eu2 76.369(10) . . ?  
 Eu1 I1 Eu2 75.226(12) 9\_565 11 ?  
 Eu1 I1 Eu2 75.226(12) 9\_566 11 ?  
 Eu3 I1 Eu2 76.370(10) 11 11 ?  
 Eu3 I1 Eu2 165.22(2) . 11 ?  
 Eu2 I1 Eu2 118.41(3) . 11 ?  
 I3 I2 I3 150.3(10) 10\_556 . ?  
 I3 I2 I3 133.0(6) 10\_556 9\_565 ?  
 I3 I2 I3 17.3(4) . 9\_565 ?  
 I3 I2 I3 17.3(4) 10\_556 2\_565 ?  
 I3 I2 I3 133.0(6) . 2\_565 ?  
 I3 I2 I3 115.6(2) 9\_565 2\_565 ?  
 I3 I2 Eu3 80.4(3) 10\_556 11 ?  
 I3 I2 Eu3 80.4(3) . 11 ?  
 I3 I2 Eu3 69.73(9) 9\_565 11 ?  
 I3 I2 Eu3 69.73(9) 2\_565 11 ?  
 I3 I2 Eu3 80.4(3) 10\_556 . ?

I3 I2 Eu3 80.4(3) . . ?  
 I3 I2 Eu3 69.73(9) 9\_565 . ?  
 I3 I2 Eu3 69.73(9) 2\_565 . ?  
 Eu3 I2 Eu3 98.82(14) 11 . ?  
 I2 I3 I3 14.9(5) . 10\_556 ?  
 I2 I3 I3 155.2(5) . 9\_565 ?  
 I3 I3 I3 140.3(2) 10\_556 9\_565 ?  
 I2 I3 I2 162.7(4) . 9\_565 ?  
 I3 I3 I2 147.82(11) 10\_556 9\_565 ?  
 I3 I3 I2 7.47(16) 9\_565 9\_565 ?  
 I2 I3 Eu3 85.2(3) . 11 ?  
 I3 I3 Eu3 75.89(17) 10\_556 11 ?  
 I3 I3 Eu3 79.01(12) 9\_565 11 ?  
 I2 I3 Eu3 83.72(15) 9\_565 11 ?  
 I2 I3 Eu3 85.2(3) . . ?  
 I3 I3 Eu3 75.89(17) 10\_556 . ?  
 I3 I3 Eu3 79.01(12) 9\_565 . ?  
 I2 I3 Eu3 83.72(15) 9\_565 . ?  
 Eu3 I3 Eu3 100.26(7) 11 . ?  
 I2 I3 Eu3 125.2(3) . 9\_565 ?  
 I3 I3 Eu3 130.71(13) 10\_556 9\_565 ?  
 I3 I3 Eu3 68.5(2) 9\_565 9\_565 ?  
 I2 I3 Eu3 63.98(19) 9\_565 9\_565 ?  
 Eu3 I3 Eu3 74.15(7) 11 9\_565 ?  
 Eu3 I3 Eu3 147.5(3) . 9\_565 ?  
 I2 I3 Eu3 125.2(3) . 3\_565 ?  
 I3 I3 Eu3 130.71(13) 10\_556 3\_565 ?  
 I3 I3 Eu3 68.5(2) 9\_565 3\_565 ?  
 I2 I3 Eu3 63.98(19) 9\_565 3\_565 ?  
 Eu3 I3 Eu3 147.5(3) 11 3\_565 ?  
 Eu3 I3 Eu3 74.15(7) . 3\_565 ?  
 Eu3 I3 Eu3 93.35(18) 9\_565 3\_565 ?  
 Eu2 I4 Eu1 166.76(2) . 5\_545 ?  
 Eu2 I4 Eu3 80.492(15) . . ?  
 Eu1 I4 Eu3 112.749(19) 5\_545 . ?  
 Eu2 I4 Eu2 111.282(11) . 13\_556 ?  
 Eu1 I4 Eu2 75.213(12) 5\_545 13\_556 ?  
 Eu3 I4 Eu2 68.748(11) . 13\_556 ?  
 Eu2 I4 Eu2 111.282(11) . 13 ?  
 Eu1 I4 Eu2 75.213(12) 5\_545 13 ?  
 Eu3 I4 Eu2 68.748(11) . 13 ?  
 Eu2 I4 Eu2 111.691(19) 13\_556 13 ?

\_diffn\_measured\_fraction\_theta\_max 0.999  
 \_diffn\_reflns\_theta\_full 34.96  
 \_diffn\_measured\_fraction\_theta\_full 0.999  
 \_refine\_diff\_density\_max 4.112

\_refine\_diff\_density\_min -3.953  
\_refine\_diff\_density\_rms 0.594
